# Supplementary material for: Comparative Transcriptome Analysis of CMV or 2b-Deficient CMV-Infected dcl2dcl4 Reveals the Effects of Viral Infection on Symptom Induction in Arabidopsis thaliana
Source: MDPI journal article supplement (doi:10.3390/v14071582), 2022-07-21
Supplement: s1 [file s1]

---

**Table S1. Primers used for q-PCR.**

| Primer      | Sequence (5'to3')       |
|-------------|-------------------------|
| AT1G31280-F | GGTGAACAACAGGATTTTCGAA  |
| AT1G31280-R | CATAACTTCAGCTACACGAACG  |
| AT1G33560-F | TGATGGAGATTGAGACGGTAAG  |
| AT1G33560-R | TCATTCCAGAGATCCCAAACAA  |
| AT3G52430-F | GAGTATCCCCGACAATAGCTAC  |
| AT3G52430-R | TCTTTGACTAAAACGCCACTTG  |
| AT1G73805-F | GCACTTATCGATGGTCATGTTC  |
| AT1G73805-R | GTTCGCCCCACTTCTAAAAAGTT |
| AT1G09350-F | ACCTTTTGCTGAACAGGATTC   |
| AT1G09350-R | ATATTCCTTCTTGGCCTGTGA   |
| AT5G03170-F | AAAGTTCAGCTTGTTTCAGTTCC |
| AT5G03170-R | GTTACCGGAGCTAGTGATGTTA  |
| AT4G38210-F | ACACTTGGAACATCTCATGCC   |
| AT4G38210-R | CACACTTGACCCTCCTATACTG  |
| AT4G04330-F | AAACTCTGTAAGTGACGGTGAT  |
| AT4G04330-R | GGCGCTTCATATTATCCCATTC  |
| AT4G10250-F | CAGCAAGAGTAGACTGGAAAGA  |
| AT4G10250-R | CTCTCCACTGACTCGTAAAACT  |
| AT2G14610-F | TGGTCACTACACTCAAGTTGTT  |
| AT2G14610-R | GCTTCTCGTTCACATAATTCCC  |
| AT3G04720-F | ATAATCCGGCGCAGAATAATTG  |
| AT3G04720-R | CAGTTACTGCAGCATTTGTTCT  |
| AT1G75040-F | AGGATTTGAATTGACTCCAGGT  |
| AT1G75040-R | CCATCGCCTACTAGAGTGAATT  |
| AT3G57260-F | CGTTGTGGCTCTTTACAAACAA  |
| AT3G57260-R | AGCTCTGAACGTTTTCTTGAAC  |
| AT2G38010-F | TTAAGAACTCCTGGTCCAGAAC  |
| AT2G38010-R | AGTGCGGATGTACTGAGAATAG  |

---

**Table S2. Basic information of transcriptome sequencing data of Arabidopsis infected CMV or CMV mutants.**

| Sample                 | Clean Reads | GC<br>Content(%) | Q20 (%) | Q30 (%) | Mapped<br>Reads | Mapping<br>Rate(%) |
|------------------------|-------------|------------------|---------|---------|-----------------|--------------------|
| Col-Mock1              | 33995460    | 45.20            | 97.79   | 90.86   | 32679268        | 96.13              |
| Col-Mock2              | 34165248    | 45.24            | 97.81   | 90.96   | 32823922        | 96.07              |
| Col-Mock3              | 35502658    | 45.10            | 97.78   | 97.78   | 33961216        | 95.66              |
| Col-CMV1               | 15307690    | 45.86            | 97.69   | 90.67   | 14685812        | 95.94              |
| Col-CMV2               | 15301916    | 45.27            | 97.83   | 91.08   | 14605836        | 95.45              |
| Col-CMV3               | 35337622    | 44.89            | 97.68   | 90.55   | 33745474        | 95.49              |
| Col-Δ2b1               | 35732482    | 45.07            | 97.63   | 90.31   | 34556244        | 96.71              |
| Col-Δ2b2               | 34038686    | 44.80            | 97.56   | 90.07   | 32802376        | 96.37              |
| Col-Δ2b3               | 34107580    | 45.20            | 97.57   | 90.12   | 33027296        | 96.83              |
| Col-2aTΔ2b1            | 34245920    | 45.86            | 97.69   | 90.67   | 31829350        | 92.94              |
| Col-2aTΔ2b2            | 17136686    | 43.40            | 97.71   | 90.68   | 16094888        | 93.92              |
| Col-2aTΔ2b3            | 35681694    | 43.31            | 97.85   | 91.04   | 33552040        | 94.03              |
| <i>dcl2/4</i> -Mock1   | 34938414    | 45.70            | 97.38   | 89.52   | 33766308        | 96.65              |
| <i>dcl2/4</i> -Mock2   | 34999866    | 45.88            | 97.42   | 89.70   | 33893420        | 96.84              |
| <i>dcl2/4</i> -Mock3   | 34944582    | 45.64            | 97.47   | 89.88   | 33778854        | 96.66              |
| <i>dcl2/4</i> - CMV 1  | 34877066    | 45.76            | 97.51   | 90.06   | 33313190        | 95.52              |
| <i>dcl2/4</i> - CMV 2  | 34048228    | 45.11            | 97.79   | 90.64   | 32531898        | 95.55              |
| <i>dcl2/4</i> - CMV 3  | 13921830    | 46.02            | 97.82   | 90.81   | 13354144        | 95.92              |
| <i>dcl2/4</i> -Δ2b1    | 34123234    | 44.77            | 97.93   | 91.04   | 32821080        | 96.18              |
| <i>dcl2/4</i> -Δ2b2    | 33948020    | 45.29            | 97.82   | 90.71   | 32814518        | 96.66              |
| <i>dcl2/4</i> -Δ2b3    | 34056650    | 45.03            | 97.80   | 90.63   | 32570286        | 95.64              |
| <i>dcl2/4</i> -2aTΔ2b1 | 34193226    | 42.50            | 98.02   | 91.34   | 31796116        | 92.99              |
| <i>dcl2/4</i> -2aTΔ2b2 | 34292456    | 44.74            | 97.89   | 90.95   | 32384672        | 94.44              |
| <i>dcl2/4</i> -2aTΔ2b3 | 35508300    | 42.98            | 97.89   | 90.90   | 32665494        | 91.99              |

**Table S3. The log<sub>2</sub>Foldchange of DEGs in all diseased plants.**

| Gene ID   | Gene       | Col-<br>CMV | Col-Δ2b  | Col-<br>2aTΔ2b | <i>dcl2/4</i> -<br>CMV | <i>dcl2/4</i> -Δ2b | <i>dcl2/4</i> -<br>2aTΔ2b |
|-----------|------------|-------------|----------|----------------|------------------------|--------------------|---------------------------|
| AT2G30950 | FTSH2      | -1.04876    | -0.60675 | NA             | -1.39758               | -1.42179           | -1.80262                  |
| AT1G12900 | GAPA-2     | -1.25864    | -0.85696 | -0.54100       | -1.92817               | -3.18391           | -3.25448                  |
| AT1G07720 | KCS3       | -1.21285    | -0.97109 | NA             | -1.52765               | -2.31993           | -2.13088                  |
| AT3G17470 | ATCRSH     | -1.32685    | -0.63988 | -0.93023       | -1.23925               | -1.97997           | -2.47471                  |
| AT4G04640 | ATPC1      | -1.49321    | -0.88481 | -0.81764       | -2.06362               | -2.35429           | -2.81177                  |
| AT3G52750 | FTSZ2-2    | -1.05207    | NA       | -0.72531       | -1.77057               | -1.90371           | -2.43015                  |
| AT1G32080 | AtLrgB     | -1.29976    | -0.59982 | -0.38746       | -1.92283               | -2.80416           | -2.70816                  |
| AT1G07640 | OBP2       | -1.44237    | NA       | NA             | -1.63291               | -1.11867           | -1.45304                  |
| AT4G22890 | PGR5-LIKE  | -1.25374    | -0.71086 | -0.33962       | -1.57654               | -2.48210           | -2.43964                  |
| AT5G54770 | THI1       | -1.44890    | -0.87348 | -0.72416       | -1.49357               | -2.00616           | -1.74673                  |
| AT5G24420 | PGL5       | -1.15208    | -0.50658 | NA             | -1.36096               | -1.59649           | -2.73878                  |
| AT5G67030 | ABA1       | -1.33716    | -0.97256 | -0.76666       | -1.83942               | -2.75672           | -2.84931                  |
| AT3G19720 | ARC5       | -1.06646    | -0.65804 | -0.55477       | -1.24006               | -2.26606           | -2.49429                  |
| AT1G16880 | ACR11      | -1.10228    | -0.84804 | -0.64912       | -1.19544               | -1.86118           | -1.74655                  |
| AT5G48300 | ADG1       | -1.20211    | -0.60178 | -0.94243       | -1.41065               | -1.24277           | -2.14099                  |
| AT4G20070 | AAH        | -1.08344    | -0.57829 | -0.51726       | -1.59593               | -2.70659           | -2.52235                  |
| AT5G61670 | AtOR       | -1.24821    | -0.93394 | -0.64541       | -1.20869               | -1.66484           | -1.70923                  |
| ATCG00120 | ATPA       | -1.03346    | -0.41617 | NA             | -1.00661               | -1.24554           | -2.11498                  |
| ATCG00480 | AthCF1beta | -1.42455    | -0.55536 | -0.92142       | -1.18525               | -1.67054           | -2.84567                  |
| AT1G44446 | ATCAO      | -1.02378    | -0.80732 | -0.81811       | -1.01996               | -2.48119           | -2.36303                  |
| AT3G63140 | CSP41A     | -1.43079    | -0.82186 | -0.35475       | -1.66297               | -2.30834           | -2.20733                  |
| AT2G42540 | AtCOR15A   | -2.02238    | NA       | NA             | -3.13781               | -4.82777           | -2.88397                  |
| AT2G31040 | AtCGL160   | -1.41613    | -0.39767 | -0.73105       | -1.94273               | -1.51812           | -2.16621                  |
| AT3G01480 | ATCYP38    | -1.20314    | -0.45078 | -0.61049       | -1.81795               | -2.30881           | -2.43874                  |
| AT1G03310 | AtBE2      | -1.26795    | NA       | NA             | -1.95989               | -2.85480           | -1.76899                  |
| AT3G11670 | DGD1       | -1.14472    | -0.74492 | -0.87050       | -1.32438               | -1.90510           | -1.86201                  |
| AT1G67440 | emb1688    | -1.44915    | -0.82349 | -0.86133       | -1.52108               | -1.75932           | -1.80746                  |
| AT1G20020 | ATLFNR2    | -1.04490    | NA       | NA             | -1.50278               | -1.19606           | -1.69052                  |
| AT5G23440 | FTRA1      | -1.03415    | -0.92831 | -0.58828       | -1.30735               | -1.21994           | -1.31010                  |
| AT2G30390 | ATFC-II    | -1.23458    | -0.62726 | -0.80725       | -1.81824               | -2.50995           | -2.49047                  |
| AT5G50950 | FUM2       | -2.12082    | -0.63564 | NA             | -2.37357               | -3.20742           | -4.04507                  |
| AT1G09350 | AtGolS3    | -3.83435    | NA       | NA             | -3.89427               | -4.26067           | -2.10429                  |
| AT5G62220 | ATGT18     | -1.20032    | -0.63680 | -0.86642       | -2.23809               | -3.49975           | -2.85694                  |
| AT2G19860 | ATHXK2     | -1.35937    | NA       | -0.76298       | -1.46012               | -1.61906           | -1.24551                  |
| AT3G17040 | HCF107     | -1.01524    | -0.52371 | -0.48287       | -1.07159               | -1.91689           | -1.89647                  |
| AT1G18870 | ATICS2     | -2.15809    | NA       | NA             | -1.93520               | -3.26237           | -1.72643                  |
| AT1G63970 | ISPF       | -1.01959    | -0.42987 | -0.47561       | -1.16468               | -1.08682           | -1.30678                  |
| AT1G01790 | ATKEA1     | -1.24330    | -0.67698 | -0.73715       | -1.59667               | -2.29279           | -2.29090                  |
| AT1G76570 | AtLHCB7    | -1.04371    | -0.79122 | NA             | -1.38836               | -2.44860           | -2.66797                  |
| AT3G55760 | LESV       | -1.39029    | 0.00000  | -0.60068       | -1.61756               | -1.12448           | -1.10812                  |
| AT3G01510 | LSF1       | -1.27061    | -0.66680 | -0.82618       | -1.54557               | -1.57063           | -1.60464                  |

| Gene ID   | Gene      | Col-CMV  | Col-Δ2b  | Col-2aTΔ2b | <i>dcl2/4</i> -CMV | <i>dcl2/4</i> -Δ2b | <i>dcl2/4</i> -2aTΔ2b |
|-----------|-----------|----------|----------|------------|--------------------|--------------------|-----------------------|
| AT3G10940 | LSF2      | -1.43792 | -0.57402 | -0.59015   | -1.96017           | -2.97390           | -2.36083              |
| AT1G75690 | LQY1      | -1.22043 | -0.73825 | -0.26644   | -1.36878           | -2.18965           | -2.05931              |
| AT5G57030 | LUT2      | -1.23332 | -0.60223 | -0.37227   | -1.37531           | -2.14737           | -2.08636              |
| AT4G02530 | MPH2      | -1.38038 | -0.75488 | -0.65032   | -1.42168           | -1.63188           | -1.94542              |
| AT4G04040 | MEE51     | -1.48733 | -0.52508 | -0.70978   | -1.37779           | -1.33790           | -1.82084              |
| AT1G53240 | mMDH1     | -1.10707 | -0.83871 | -0.54307   | -1.29735           | -1.64643           | -1.46537              |
| AT1G31190 | IMPL1     | -1.01106 | -0.76315 | NA         | -1.09728           | -1.50925           | -1.52705              |
| AT5G10170 | ATMIPS3   | -1.44614 | NA       | -0.79191   | -1.53583           | -2.55402           | -2.46920              |
| AT1G32070 | ATNSI     | -1.05059 | -0.53296 | -0.63115   | -1.20262           | -1.15998           | -1.34480              |
| AT5G04900 | NOL       | -1.03262 | -0.43222 | -0.79471   | -1.38799           | -1.29300           | -2.21014              |
| AT5G51820 | ATPGMP    | -1.07773 | NA       | NA         | -1.41774           | -1.29045           | -1.64058              |
| AT4G24620 | PGI       | -1.00914 | -0.58994 | -0.57264   | -1.18744           | -1.53840           | -1.79053              |
| AT3G12780 | PGK1      | -1.18170 | -0.82884 | -0.43858   | -1.39467           | -1.70621           | -1.80203              |
| AT4G19100 | PAM68     | -1.01872 | NA       | -0.57171   | -1.20303           | -1.55338           | -1.95818              |
| AT3G16250 | NDF4      | -1.59442 | -0.88650 | -0.98740   | -1.81428           | -2.74441           | -2.78688              |
| AT1G18730 | NDF6      | -1.18690 | NA       | -0.82149   | -1.81300           | -2.21129           | -2.92033              |
| AT1G19150 | LHCA2*1   | -1.33323 | -0.75068 | -0.72271   | -1.78648           | -3.10848           | -3.44945              |
| ATCG00280 | PSBC      | -1.23660 | NA       | NA         | -2.44630           | -2.48612           | -2.00217              |
| AT2G20890 | PSB29     | -1.15741 | -0.39141 | -0.61774   | -1.57128           | -1.71879           | -2.19199              |
| AT1G06680 | OE23      | -1.14442 | -0.78969 | NA         | -1.14361           | -2.00531           | -1.83156              |
| AT4G05180 | PSBQ      | -1.24250 | -0.68055 | -0.54706   | -1.35890           | -1.84597           | -2.31956              |
| AT5G17230 | PSY       | -1.15109 | -0.90603 | -0.93453   | -1.57380           | -2.50134           | -2.67229              |
| AT1G66840 | PMI2      | -1.38539 | -0.85803 | -0.73038   | -2.64067           | -4.13796           | -2.77461              |
| AT3G52150 | PSRP2     | -1.18253 | -0.31144 | -0.45560   | -1.69872           | -1.38997           | -1.97556              |
| AT1G55480 | ZKT       | -1.50448 | -0.91009 | -0.82124   | -1.78119           | -2.35546           | -2.80633              |
| AT1G03630 | POR       | -1.39158 | -0.77992 | -0.82723   | -1.95464           | -2.35842           | -2.78551              |
| AT3G56650 | PPD6      | -1.00783 | -0.48983 | -0.46660   | -1.05492           | -1.12531           | -1.49217              |
| AT2G01918 | PQL3      | -1.18032 | NA       | NA         | -1.40930           | -2.93309           | -1.96505              |
| AT3G30720 | QQS       | -1.88113 | NA       | NA         | -1.68412           | -1.06196           | -1.11014              |
| AT5G66400 | ATDI8     | -2.27762 | NA       | NA         | -1.51357           | -2.66980           | -2.82521              |
| AT1G08540 | ABC1      | -1.03037 | -0.49068 | -0.48089   | -1.45767           | -1.76451           | -2.19292              |
| AT5G38410 | RBCS3B    | -1.03076 | -0.80758 | NA         | -1.39400           | -2.33631           | -2.29586              |
| AT5G40390 | RS5       | -1.58364 | NA       | NA         | -2.16299           | -2.39553           | -1.95172              |
| AT4G37930 | SHM1      | -1.34996 | -0.93034 | NA         | -1.45300           | -2.13841           | -1.97538              |
| AT1G64860 | RPOD1     | -1.31572 | -0.97636 | -0.84730   | -1.49851           | -2.54042           | -2.55016              |
| AT1G62750 | ATSCO1    | -1.20604 | -0.95042 | -0.82286   | -1.37916           | -2.25177           | -2.33964              |
| AT3G01180 | AtSS2     | -1.21451 | -0.85151 | -0.64847   | -1.70786           | -2.36700           | -2.79689              |
| AT1G44000 | SGRL      | -1.09824 | -0.87139 | -0.61330   | -1.15711           | -2.65538           | -2.05908              |
| AT1G68830 | STN7      | -1.24637 | -0.89457 | -0.90719   | -1.26333           | -1.55256           | -1.91322              |
| AT1G22710 | ATSUC2    | -1.30280 | NA       | -0.87167   | -1.44032           | -1.04949           | -1.27605              |
| AT1G03680 | ATHM1     | -1.19325 | -0.69821 | -0.50531   | -1.02510           | -1.05719           | -1.47398              |
| AT1G54780 | AtTLP18.3 | -1.62344 | -0.70733 | -0.93516   | -1.89528           | -2.16894           | -2.58338              |

| Gene ID   | Gene      | Col-CMV  | Col-Δ2b  | Col-2aTΔ2b | <i>dcl2/4</i> -CMV | <i>dcl2/4</i> -Δ2b | <i>dcl2/4</i> -2aTΔ2b |
|-----------|-----------|----------|----------|------------|--------------------|--------------------|-----------------------|
| AT1G77490 | TAPX      | -1.34699 | -0.51580 | -0.79996   | -2.23315           | -2.47798           | -3.46900              |
| AT2G37720 | TBL15     | -1.63707 | NA       | NA         | -3.27835           | -4.85703           | -2.68741              |
| AT1G70230 | AXY4      | -1.42331 | -0.59321 | NA         | -2.37823           | -3.05013           | -2.05810              |
| AT5G05860 | UGT76C2   | -1.32012 | -0.89368 | NA         | -1.26499           | -2.60275           | -2.14250              |
| AT5G17790 | OZ1       | -1.02296 | -0.69847 | -0.64258   | -1.26290           | -1.62459           | -1.59761              |
| AT4G23160 | CRK8      | 2.32010  | NA       | NA         | 4.70134            | 6.16321            | 5.36731               |
| AT1G33560 | ADR1      | 1.51739  | NA       | NA         | 2.08977            | 2.49932            | 2.26223               |
| AT5G04720 | ADR1-L2   | 1.20660  | NA       | NA         | 1.67173            | 1.92094            | 1.02334               |
| AT1G31280 | AGO2      | 1.94809  | NA       | -0.87971   | 3.23578            | 2.28215            | 1.47060               |
| AT5G48380 | BIR1      | 1.67029  | NA       | NA         | 2.84167            | 3.97184            | 2.83254               |
| AT5G39670 | CML46     | 1.65537  | NA       | NA         | 4.58765            | 5.60896            | 4.90176               |
| AT4G23190 | AT-RLK3   | 2.64969  | 0.00000  | NA         | 3.18723            | 4.34096            | 1.62035               |
| AT4G23210 | CRK13     | 2.38546  | NA       | NA         | 4.32987            | 6.78806            | 5.20509               |
| AT4G23230 | CRK15     | 1.18755  | NA       | -1.85583   | 3.01389            | 4.03684            | 2.72085               |
| AT4G23140 | CRK6      | 2.00363  | NA       | -1.82166   | 4.19334            | 5.35433            | 4.04102               |
| AT1G07000 | ATEXO70B2 | 1.61871  | NA       | NA         | 3.35747            | 4.29040            | 4.19320               |
| AT2G33340 | MAC3B     | 1.18017  | 0.61277  | 0.60155    | 1.60850            | 1.44476            | 1.37918               |
| AT5G46050 | AtNPF5.2  | 2.03954  | NA       | NA         | 4.57864            | 6.71247            | 5.37613               |
| AT3G52430 | ATPAD4    | 1.44969  | NA       | NA         | 3.62058            | 4.90619            | 4.60006               |
| AT2G32680 | AtRLP23   | 1.43955  | NA       | -1.45041   | 4.01942            | 5.57942            | 4.95289               |
| AT1G61380 | LORE      | 1.06848  | 0.68970  | NA         | 1.37083            | 2.71528            | 1.88122               |
| AT1G73805 | SARD1     | 2.44403  | NA       | NA         | 4.97588            | 5.72237            | 4.30534               |
| AT5G14930 | SAG101    | 1.41841  | NA       | NA         | 2.30638            | 3.73451            | 2.20859               |
| AT5G25440 | SZE1      | 1.58658  | NA       | NA         | 2.65150            | 3.08551            | 2.25368               |

---

**Table S4. The log<sub>2</sub>Foldchange of DEGs specifically detected in Col-CMV.**

| Gene ID   | Gene  | Col-CMV  | Col-Δ2b  | Col-2aTΔ2b | <i>dcl2/4</i> -CMV | <i>dcl2/4</i> -Δ2b | <i>dcl2/4</i> -2aTΔ2b |
|-----------|-------|----------|----------|------------|--------------------|--------------------|-----------------------|
| AT4G32460 | BDX   | 1.632128 | NA       | 0.801056   | NA                 | NA                 | NA                    |
| AT3G55990 | ESK1  | 1.459813 | NA       | NA         | NA                 | NA                 | NA                    |
| AT4G38210 | EXP20 | 3.406258 | 0        | 0          | NA                 | NA                 | NA                    |
| AT4G38400 | EXLA2 | 1.217828 | NA       | NA         | 0.891893           | NA                 | NA                    |
| AT5G03170 | FLA11 | 1.057445 | NA       | NA         | NA                 | -1.31325           | NA                    |
| AT1G17560 | HLL   | 1.444426 | NA       | NA         | NA                 | 0.676283           | NA                    |
| AT4G18780 | CESA8 | 1.812452 | NA       | NA         | NA                 | NA                 | NA                    |
| AT3G18660 | GUX1  | 2.027156 | NA       | NA         | NA                 | NA                 | NA                    |
| AT2G36570 | PXC1  | 1.240795 | 0.834453 | NA         | NA                 | NA                 | NA                    |
| AT2G40320 | TBL33 | 1.058063 | NA       | NA         | NA                 | NA                 | NA                    |
| AT2G28315 | UXT1  | 1.860752 | NA       | NA         | NA                 | NA                 | NA                    |
| AT4G14130 | XTH15 | 2.122686 | NA       | NA         | NA                 | NA                 | NA                    |
| AT4G30290 | XTH19 | 3.038013 | NA       | NA         | NA                 | NA                 | -1.74706              |
| AT2G06850 | XTH4  | 1.380831 | NA       | NA         | NA                 | NA                 | -1.13558              |
| AT4G04330 | RBCX1 | -2.17407 | 1.228489 | 0.751557   | -1.47059           | 0.717836           | NA                    |
| AT3G63160 | OEP6  | -1.18245 | NA       | 0.565459   | -0.79089           | -0.82909           | -0.80548              |
| AT4G39730 | PLAT1 | -1.43058 | -0.8276  | NA         | -0.96338           | -0.73827           | NA                    |
| AT5G54640 | HTA1  | -1.27537 | -0.76267 | -0.53992   | NA                 | NA                 | NA                    |

**Table S5. The log<sub>2</sub>Foldchange of DEGs specifically detected in all virus-infected *dcl2/4*.**

| Gene ID   | Gene    | Col-CMV | Col-Δ2b  | Col-<br>2aTΔ2b | <i>dcl2/4</i> -<br>CMV | <i>dcl2/4</i> -<br>Δ2b | <i>dcl2/4</i> -<br>2aTΔ2b |
|-----------|---------|---------|----------|----------------|------------------------|------------------------|---------------------------|
| AT2G21280 | ATSULA  | 0.60599 | NA       | NA             | -1.05564               | -1.26498               | -1.36246                  |
| AT3G58830 | PGPP1   | 0.67514 | NA       | NA             | -1.21159               | -1.49849               | -1.60440                  |
| AT3G51895 | AST12   | NA      | NA       | NA             | -1.10236               | -1.88274               | -1.09332                  |
| AT3G24590 | PLSP1   | 0.85027 | NA       | 0.33381        | -1.24116               | -1.42406               | -1.47736                  |
| AT5G23120 | HCF136  | 0.95808 | 0.44049  | 0.70353        | -1.48939               | -2.14683               | -2.62188                  |
| AT4G09010 | APX4    | 0.98644 | NA       | 0.34682        | -1.51266               | -1.68008               | -2.30445                  |
| AT3G08010 | ATAB2   | 0.87238 | 0.29303  | NA             | -1.25156               | -1.39727               | -1.62154                  |
| AT3G20270 | LBR-2   | 0.59267 | NA       | NA             | -1.22588               | -1.32030               | -1.02218                  |
| AT5G55580 | mTERF9  | 0.49025 | NA       | NA             | -1.17393               | -2.07937               | -1.76588                  |
| AT5G55220 | TIG1    | NA      | NA       | -0.54060       | -1.48510               | -1.32948               | -1.43937                  |
| AT5G21920 | ATYLMG2 | 0.94606 | 0.39260  | 0.90199        | -1.41813               | -1.51593               | -2.45753                  |
| AT1G10830 | Z-ISO   | 0.64097 | NA       | NA             | -1.06794               | -1.01296               | -1.50278                  |
| AT5G46290 | KAS1    | 0.80291 | 0.43088  | 0.52533        | -1.21307               | -1.24720               | -1.75900                  |
| AT2G16280 | KCS9    | 0.48526 | 0.64162  | 0.76419        | -1.22496               | -2.24027               | -2.10510                  |
| AT1G52340 | ABA2    | NA      | NA       | NA             | -1.14240               | -1.85265               | -1.44181                  |
| AT5G65800 | ACS5    | 0.00000 | 0.00000  | 0.00000        | -2.55904               | -4.01173               | -4.63464                  |
| AT5G42480 | ARC6    | 0.57443 | NA       | 0.41324        | -1.05258               | -1.22216               | -1.41788                  |
| AT4G25050 | ACP4    | 0.79440 | 0.34448  | NA             | -1.25082               | -1.81148               | -1.71873                  |
| AT1G24490 | ALB4    | 0.75570 | NA       | 0.50500        | -1.00166               | -1.25890               | -1.21065                  |
| AT4G35450 | AFT     | 0.89284 | 0.63982  | 0.44253        | -1.07500               | -1.53118               | -1.84916                  |
| AT5G65010 | ASN2    | NA      | 0.43445  | 0.55175        | -1.02539               | -1.69587               | -1.18628                  |
| AT2G29940 | ABCG31  | NA      | NA       | NA             | -2.48272               | -2.03147               | -1.84130                  |
| AT1G32500 | ABCI7   | 0.78640 | NA       | NA             | -1.26819               | -1.22202               | -1.36921                  |
| AT2G38120 | AtAUX1  | NA      | NA       | NA             | -1.31771               | -1.87043               | -1.23636                  |
| AT4G33580 | ATBCA5  | 0.75712 | 0.75866  | 0.82171        | -1.13235               | -2.14896               | -2.24569                  |
| AT1G26560 | BGLU40  | 0.75320 | 0.78122  | 0.83759        | -1.57375               | -2.97379               | -2.86179                  |
| AT4G12030 | BASS5   | NA      | NA       | NA             | -1.02524               | -3.71998               | -2.39437                  |
| AT3G29185 | BFA1    | 0.45343 | NA       | NA             | -1.00781               | -1.30721               | -1.64762                  |
| AT3G57180 | BPG2    | 0.66460 | NA       | NA             | -1.42553               | -1.52415               | -1.99805                  |
| AT5G23060 | CaS     | 0.51045 | NA       | 0.49334        | -1.02022               | -2.19333               | -2.59028                  |
| AT1G06820 | CCR2    | 0.54505 | NA       | 0.67277        | -1.15239               | -1.21667               | -2.00902                  |
| AT5G05270 | AtCHIL  | 0.66318 | 0.90769  | NA             | -1.51741               | -3.81225               | -2.52115                  |
| AT1G25425 | CLE43   | 0.95489 | 0.62128  | NA             | -1.14880               | -2.30017               | -1.57323                  |
| AT2G32950 | ATCOP1  | 0.47062 | 0.42013  | 0.81324        | -1.30963               | -1.69331               | -2.30000                  |
| AT3G56940 | ACSF    | 0.82608 | 0.57568  | 0.32435        | -1.20670               | -2.20130               | -2.25112                  |
| AT2G07050 | CAS1    | 0.65985 | NA       | 0.74824        | -1.04912               | -1.19359               | -1.64877                  |
| AT2G31170 | FIONA   | NA      | NA       | NA             | -1.06511               | -1.27779               | -1.22598                  |
| AT3G60620 | CDS5    | 0.72456 | NA       | 0.43202        | -1.16336               | -1.52817               | -1.38749                  |
| AT4G00360 | ATT1    | NA      | 0.74680  | 0.85699        | -1.29262               | -2.29014               | -2.54014                  |
| AT2G47940 | DEG2    | 0.39600 | -0.45073 | 0.68655        | -1.11088               | -1.08830               | -2.00669                  |

| Gene ID   | Gene      | Col-CMV | Col-Δ2b  | Col-2aTΔ2b | <i>dcl2/4</i> -CMV | <i>dcl2/4</i> -Δ2b | <i>dcl2/4</i> -2aTΔ2b |
|-----------|-----------|---------|----------|------------|--------------------|--------------------|-----------------------|
| AT1G06080 | ADS1      | NA      | NA       | NA         | -3.02635           | -3.32595           | -1.28777              |
| AT1G80030 | DJA7      | 0.77223 | 0.36981  | NA         | -1.09430           | -1.74390           | -1.45234              |
| AT4G04350 | EMB2369   | 0.65178 | NA       | 0.39138    | -1.20868           | -1.37931           | -1.71129              |
| AT3G04340 | emb2458   | 0.49005 | NA       | NA         | -1.01418           | -1.06393           | -1.48638              |
| AT5G18570 | ATOBGC    | NA      | NA       | NA         | -1.37574           | -1.31262           | -1.66498              |
| AT3G02660 | EMB2768   | NA      | NA       | NA         | -1.08821           | -1.19511           | -1.63006              |
| AT5G64580 | EMB3144   | 0.68250 | NA       | NA         | -1.75318           | -1.49558           | -2.00192              |
| AT2G30200 | EMB3147   | 0.97728 | NA       | 0.46929    | -1.19065           | -1.04393           | -1.79853              |
| AT5G39980 | EMB3140   | NA      | NA       | NA         | -1.32986           | -1.45070           | -1.05474              |
| AT1G54040 | ESP       | 0.50820 | NA       | NA         | -1.00287           | -1.65477           | -2.18133              |
| AT5G05740 | ATEGY2    | 0.52768 | NA       | NA         | -1.25779           | -1.25850           | -1.44289              |
| AT2G45470 | AGP8      | NA      | 0.37134  | NA         | -1.96285           | -3.70135           | -2.72283              |
| AT1G53520 | AtFAP3    | NA      | -0.58228 | -0.65115   | -1.08133           | -1.28531           | -1.13783              |
| AT5G66190 | ATLFNR1   | 0.94837 | 0.40483  | 0.50172    | -1.33357           | -1.66489           | -2.19604              |
| AT3G02450 | FtsHi3    | 0.74421 | NA       | NA         | -1.28600           | -1.65869           | -1.61558              |
| AT5G53170 | FTSH11    | 0.56312 | NA       | 0.80195    | -1.06495           | -1.18512           | -2.18824              |
| AT1G03160 | FZL       | 0.91008 | NA       | 0.44622    | -1.12572           | -1.28837           | -1.57209              |
| AT2G36830 | GAMMA-TIP | 0.60277 | 0.84079  | 0.45742    | -1.31673           | -3.42053           | -2.56530              |
| AT4G27600 | NARA5     | NA      | NA       | NA         | -1.04116           | -1.38589           | -1.51041              |
| AT5G13630 | ABAR      | 0.87713 | 0.91440  | 0.67207    | -1.02012           | -2.09019           | -2.49757              |
| AT1G42540 | ATGLR3.3  | 0.47151 | NA       | 0.49378    | -1.08649           | -1.17425           | -1.58525              |
| AT1G42970 | GAPB      | 0.98034 | 0.85445  | 0.82978    | -1.42578           | -2.30347           | -2.68836              |
| AT1G50900 | GDC1      | 0.76600 | NA       | 0.60447    | -1.49150           | -1.88056           | -1.86530              |
| AT3G28920 | AtHB34    | 0.70725 | 0.47869  | 0.95117    | -1.11338           | -1.38016           | -1.18156              |
| AT3G11945 | ATHST     | 0.87474 | 0.32135  | 0.78868    | -1.37461           | -1.42659           | -2.01194              |
| AT1G60990 | IBA57.2   | 0.53792 | NA       | 0.69983    | -1.50902           | -1.61365           | -2.59966              |
| AT4G17600 | LIL3:1    | NA      | NA       | NA         | -1.10994           | -1.63938           | -1.59895              |
| AT1G77590 | LACS9     | 0.61588 | 0.40713  | NA         | -1.11927           | -1.28357           | -1.44799              |
| AT3G46610 | LPE1      | 0.61306 | NA       | NA         | -1.03476           | -1.55975           | -1.43787              |
| AT5G22830 | ATMGT10   | 0.99415 | NA       | 0.79349    | -1.30956           | -1.28607           | -2.04130              |
| AT3G16000 | MFP1      | 0.78805 | NA       | NA         | -1.19617           | -1.62425           | -1.19113              |
| AT1G78610 | MSL6      | 0.43175 | NA       | NA         | -1.31581           | -1.26343           | -1.96454              |
| AT5G11790 | NDL2      | 0.94789 | 0.74394  | 0.77256    | -1.02185           | -2.02814           | -1.78190              |
| AT2G41680 | NTRC      | 0.86821 | 0.41128  | 0.28462    | -1.37523           | -1.75740           | -1.66937              |
| AT2G38010 | AtNCER2   | 0.62180 | -0.54996 | NA         | -1.26153           | -1.04076           | -1.28374              |
| AT5G65720 | ATNFS1    | 0.41218 | 0.42714  | 0.75299    | -1.04278           | -1.19298           | -1.33333              |
| AT3G47450 | ATNOA1    | 0.56200 | NA       | NA         | -1.22990           | -1.14139           | -1.61424              |
| AT1G44575 | CP22      | 0.89200 | 0.81618  | 0.69051    | -1.37762           | -2.36861           | -2.48162              |
| AT1G62590 | AtPPR-AC  | NA      | NA       | NA         | -1.40011           | -1.98057           | -2.77214              |
| AT3G23430 | ATPHO1    | NA      | NA       | NA         | -1.03074           | -2.35967           | -1.61599              |
| AT2G39470 | PnsL1     | 0.99343 | 0.57695  | 0.38307    | -1.16182           | -2.15708           | -1.93570              |



| Gene ID   | Gene      | Col-CMV | Col-Δ2b | Col-2aTΔ2b | <i>dcl2/4</i> -CMV | <i>dcl2/4</i> -Δ2b | <i>dcl2/4</i> -2aTΔ2b |
|-----------|-----------|---------|---------|------------|--------------------|--------------------|-----------------------|
| AT5G58140 | AtPHOT2   | 0.76245 | NA      | 0.87168    | -1.28799           | -2.26952           | -2.84889              |
| AT1G23080 | ATPIN7    | 0.43053 | NA      | 0.44583    | -1.52126           | -2.66745           | -1.65916              |
| AT4G23400 | PIP1;5    | 0.77642 | 0.83168 | 0.70343    | -1.14196           | -1.91003           | -1.29516              |
| AT5G38150 | PMI15     | 0.86717 | NA      | NA         | -1.67787           | -1.68019           | -1.16841              |
| AT1G64510 | PRPS6     | 0.89074 | 0.38598 | 0.51446    | -1.03155           | -1.15576           | -1.73189              |
| AT5G54180 | PTAC15    | 0.64864 | NA      | NA         | -1.25582           | -1.51809           | -2.22753              |
| AT4G13670 | PTAC5     | 0.67025 | NA      | 0.41422    | -1.04764           | -1.45371           | -1.63871              |
| AT3G55330 | PPL1      | 0.78259 | 0.35493 | NA         | -1.04331           | -1.75911           | -1.72549              |
| AT3G21110 | ATPURC    | NA      | NA      | NA         | -1.06318           | -1.53362           | -1.75767              |
| AT4G04340 | osca1     | 0.81504 | NA      | NA         | -1.06056           | -1.20623           | -1.41915              |
| AT4G02260 | AT-RSH1   | 0.74857 | NA      | NA         | -1.04727           | -1.40566           | -1.44107              |
| ATCG00780 | RPL14     | 0.62135 | NA      | -0.30325   | -1.21774           | -1.28826           | -1.28349              |
| AT3G63190 | AtcpRRF   | 0.75936 | NA      | NA         | -1.17667           | -1.19625           | -1.07570              |
| AT3G62030 | CYP20-3   | 0.86940 | 0.35853 | NA         | -1.19426           | -1.23406           | -1.30787              |
| AT3G25570 | SAMDC3    | 0.99039 | NA      | NA         | -1.33779           | -1.87794           | -1.04925              |
| AT2G35500 | SKL2      | 0.64186 | NA      | NA         | -1.14968           | -1.03038           | -1.55096              |
| AT1G11720 | ATSS3     | 0.64613 | NA      | NA         | -1.20886           | -1.57465           | -1.93064              |
| AT2G46340 | SPA1      | 0.94975 | 0.42718 | 0.76708    | -1.80864           | -2.38923           | -1.66865              |
| AT2G43710 | AtSSI2    | 0.96031 | 0.81477 | 0.68236    | -1.26602           | -2.14193           | -2.01690              |
| AT5G13650 | SVR3      | 0.86169 | 0.61677 | 0.70137    | -1.65397           | -2.37822           | -2.70456              |
| AT4G16390 | SVR7      | 0.86171 | NA      | 0.53370    | -1.35325           | -1.22085           | -1.22853              |
| AT4G18390 | TCP2      | NA      | NA      | NA         | -1.09427           | -1.73268           | -1.12367              |
| AT5G53490 | TL17      | 0.91271 | NA      | NA         | -1.19422           | -1.47353           | -1.73913              |
| AT5G16620 | ATTIC40   | NA      | NA      | -0.41187   | -1.01148           | -1.00797           | -1.30961              |
| AT2G30460 | UXT2      | 0.75535 | NA      | 0.71616    | -1.36815           | -1.63097           | -1.76911              |
| AT5G11230 | UAFT2     | NA      | NA      | NA         | -1.21558           | -1.41544           | -1.16734              |
| AT4G12490 | AZI3      | 0.00000 | 0.00000 | 0.00000    | 6.19668            | 10.15793           | 10.19413              |
| AT1G73260 | ATKTI1    | 0.00000 | 0.00000 | 0.00000    | 4.21099            | 8.13837            | 11.11922              |
| AT2G14610 | AtCAPE9   | NA      | NA      | 3.64813    | 4.88181            | 9.13765            | 9.18787               |
| AT1G66700 | PXMT1     | NA      | NA      | NA         | 5.48484            | 7.62354            | 9.74821               |
| AT5G64905 | PROPEP3   | NA      | 0.00000 | 0.00000    | 6.64256            | 9.16496            | 6.89509               |
| AT4G12480 | EARLI1    | 0.00000 | 0.00000 | 0.00000    | 3.87684            | 8.46059            | 7.93555               |
| AT2G43510 | ATTI1     | NA      | NA      | NA         | 4.86098            | 7.03814            | 7.67610               |
| AT1G79680 | ATWAKL10  | NA      | 0.00000 | NA         | 4.21513            | 7.68951            | 6.24356               |
| AT3G57260 | AtBG2     | NA      | NA      | NA         | 4.77443            | 6.85092            | 6.49609               |
| AT2G43570 | CHI       | NA      | NA      | NA         | 4.42596            | 6.52516            | 6.97102               |
| AT4G10250 | ATHSP22.0 | 0.00000 | 0.00000 | 0.00000    | 5.88810            | 6.46311            | 5.06256               |
| AT2G29110 | ATGLR2.8  | NA      | 0.00000 | NA         | 4.85827            | 7.20545            | 5.10202               |
| AT2G35980 | ATNHL10   | NA      | 0.00000 | NA         | 3.77181            | 6.87019            | 5.78828               |
| AT1G32960 | ATSBT3.3  | NA      | NA      | NA         | 4.50433            | 6.33515            | 5.50720               |
| AT4G21680 | AtNPF7.2  | 0.00000 | 0.00000 | NA         | 4.59660            | 6.48820            | 5.14498               |
| AT5G11210 | ATGLR2.5  | NA      | NA      | NA         | 3.06175            | 6.57890            | 6.56110               |

| Gene ID   | Gene      | Col-CMV  | Col-Δ2b | Col-2aTΔ2b | <i>dcl2/4</i> -CMV | <i>dcl2/4</i> -Δ2b | <i>dcl2/4</i> -2aTΔ2b |
|-----------|-----------|----------|---------|------------|--------------------|--------------------|-----------------------|
| AT4G11470 | CRK31     | NA       | NA      | NA         | 4.28819            | 6.37789            | 5.17253               |
| AT1G34180 | anac016   | NA       | 0.00000 | NA         | 4.34604            | 6.26161            | 5.21563               |
| AT3G46230 | ATHSP17.4 | NA       | 0.00000 | 0.00000    | 6.47538            | 5.04776            | 4.14287               |
| AT3G44300 | AtNIT2    | NA       | NA      | NA         | 3.32235            | 6.11269            | 6.06624               |
| AT4G27460 | CBSX5     | NA       | 0.00000 | NA         | 4.83269            | 5.29418            | 5.05758               |
| AT4G23310 | CRK23     | NA       | NA      | 2.93813    | 4.33907            | 6.41884            | 4.10503               |
| AT1G68765 | IDA       | 0.00000  | 0.00000 | 0.00000    | 4.16282            | 6.10906            | 4.03205               |
| AT4G13890 | EDA36     | 0.00000  | 0.00000 | 0.00000    | 2.76216            | 5.44734            | 5.88654               |
| AT4G23150 | CRK7      | NA       | NA      | 2.76986    | 3.90315            | 5.76861            | 4.42110               |
| AT1G26380 | AtBBE3    | NA       | NA      | 3.78407    | 2.93682            | 5.87600            | 4.37102               |
| AT5G10380 | ATRNG1    | NA       | NA      | 0.57411    | 3.16746            | 4.76171            | 5.11837               |
| AT2G26560 | PLA       | NA       | NA      | NA         | 2.76983            | 6.36949            | 3.82957               |
| AT1G75040 | PR-5      | NA       | NA      | 1.12637    | 2.70642            | 4.77103            | 5.44977               |
| AT3G09940 | AtMDAR3   | NA       | NA      | 0.00000    | 2.75723            | 5.38246            | 4.60085               |
| AT1G09080 | BIP3      | NA       | NA      | 1.88669    | 3.40125            | 4.40708            | 4.84479               |
| AT4G11170 | RMG1      | NA       | NA      | NA         | 2.33318            | 5.48496            | 4.70810               |
| AT4G10500 | DLO1      | 2.28106  | NA      | NA         | 2.64313            | 4.52412            | 5.21030               |
| AT5G48650 | G3BP-like | NA       | 0.00000 | NA         | 4.30746            | 4.14830            | 3.80342               |
| AT5G64810 | ATWRKY51  | NA       | NA      | 2.53294    | 3.43886            | 4.53434            | 4.24618               |
| AT4G02520 | ATGSTF2   | NA       | 1.27794 | 1.54688    | 3.45429            | 4.14387            | 4.53707               |
| AT4G21840 | ATMSRB8   | 2.40064  | 2.81191 | 3.75586    | 2.33354            | 4.81725            | 4.76287               |
| AT5G15120 | PCO1      | NA       | NA      | NA         | 2.86096            | 6.16492            | 2.83218               |
| AT5G26170 | ATWRKY50  | -0.68564 | NA      | NA         | 3.05418            | 4.45822            | 4.22429               |
| AT1G03850 | ATGRXS13  | NA       | NA      | 1.83424    | 2.67586            | 5.00151            | 4.04925               |
| AT2G47130 | AtSDR3    | NA       | 0.90420 | 1.43708    | 3.18045            | 4.11002            | 4.12319               |
| AT5G55460 | AtLTP4.5  | NA       | NA      | 1.64023    | 2.95695            | 4.33166            | 4.06777               |
| AT2G35000 | ATL2G     | NA       | 0.00000 | NA         | 2.91614            | 4.31834            | 4.10813               |
| AT5G39610 | ANAC092   | 0.00000  | 0.00000 | 0.00000    | 2.58767            | 4.44464            | 4.09389               |
| AT5G01900 | ATWRKY62  | NA       | NA      | NA         | 2.57532            | 4.62707            | 3.90998               |
| AT3G59700 | ATHLECRK  | NA       | NA      | NA         | 2.93610            | 4.72406            | 3.37562               |
| AT3G04720 | AtPR4     | NA       | 0.91583 | 1.90269    | 2.18542            | 3.76049            | 4.24530               |
| AT4G33050 | AtIQM1    | NA       | NA      | NA         | 2.98640            | 4.17679            | 2.84096               |
| AT4G26270 | PFK3      | NA       | NA      | NA         | 2.10330            | 3.88477            | 3.39752               |
| AT3G11840 | PUB24     | NA       | NA      | NA         | 2.35025            | 4.10999            | 2.48443               |
| AT4G21390 | B120      | NA       | NA      | NA         | 2.97965            | 4.17904            | 1.71136               |
| AT1G06160 | ERF59     | NA       | NA      | NA         | 3.28225            | 2.55718            | 2.96674               |
| AT4G34390 | XLG2      | NA       | NA      | NA         | 2.64302            | 3.78729            | 2.26242               |
| AT1G08450 | AtCRT3    | -0.99135 | NA      | NA         | 2.34064            | 3.26907            | 3.06249               |
| AT2G19990 | PR-1-LIKE | NA       | 0.00000 | NA         | 3.23959            | 2.40547            | 2.70272               |
| AT5G22570 | ATWRKY38  | NA       | NA      | NA         | 1.72395            | 3.20000            | 3.29246               |
| AT3G50470 | HR3       | -0.79690 | NA      | 1.10074    | 2.58120            | 3.17874            | 2.32314               |
| AT2G48150 | ATGPX4    | 0.00000  | 0.00000 | NA         | 2.54523            | 3.01972            | 2.47883               |

| Gene ID   | Gene       | Col-CMV  | Col-Δ2b  | Col-2aTΔ2b | <i>dcl2/4</i> -CMV | <i>dcl2/4</i> -Δ2b | <i>dcl2/4</i> -2aTΔ2b |
|-----------|------------|----------|----------|------------|--------------------|--------------------|-----------------------|
| AT5G38280 | PR5K       | NA       | NA       | NA         | 2.21096            | 3.36248            | 2.40664               |
| AT3G07520 | ATGLR1.4   | -0.69378 | NA       | NA         | 2.15715            | 3.11533            | 2.64371               |
| AT1G02930 | ATGST1     | NA       | 2.14482  | 2.61516    | 2.08011            | 3.61524            | 2.15545               |
| AT1G51800 | IOS1       | NA       | NA       | 1.44195    | 1.76504            | 3.88558            | 2.19472               |
| AT2G25000 | ATWRKY60   | NA       | NA       | 1.26271    | 1.61444            | 3.02953            | 3.18640               |
| AT3G51430 | SSL5       | NA       | NA       | NA         | 1.61083            | 3.00161            | 3.04524               |
| AT3G16030 | CES101     | NA       | NA       | NA         | 2.39182            | 3.43014            | 1.70776               |
| AT4G39030 | EDS5       | NA       | NA       | NA         | 1.57057            | 3.50910            | 2.38470               |
| AT1G62300 | ATWRKY6    | NA       | NA       | NA         | 1.47812            | 3.55834            | 2.28345               |
| AT3G54420 | ATCHITIV   | NA       | 0.00000  | NA         | 2.23527            | 3.07039            | 1.87836               |
| AT3G45860 | CRK4       | NA       | NA       | 2.39117    | 1.98025            | 3.04412            | 1.98805               |
| AT1G70690 | HWI1       | NA       | NA       | NA         | 1.38929            | 2.31288            | 3.30669               |
| AT3G12500 | ATHCHIB    | NA       | NA       | NA         | 1.84109            | 2.18359            | 2.89058               |
| AT5G35580 | PBL13      | NA       | 0.00000  | NA         | 1.97439            | 3.00941            | 1.88873               |
| AT1G24150 | ATFH4      | NA       | NA       | NA         | 1.94436            | 3.15763            | 1.73134               |
| AT3G25020 | AtRLP42    | NA       | NA       | 1.28959    | 1.43078            | 2.54265            | 2.84150               |
| AT4G33300 | ADR1-L1    | -0.95706 | NA       | NA         | 1.97530            | 2.67538            | 2.09459               |
| AT1G77120 | ADH        | NA       | NA       | NA         | 1.58389            | 3.56208            | 1.54270               |
| AT5G60280 | LecRK-I.8  | -0.77698 | NA       | NA         | 1.66683            | 2.69081            | 2.12809               |
| AT1G74710 | ATICS1     | NA       | 0.67872  | 1.04857    | 1.25502            | 3.04154            | 2.16926               |
| AT2G31870 | atPARG1    | -0.77769 | -0.88800 | NA         | 1.92914            | 2.62249            | 1.87891               |
| AT3G45060 | ATNRT2.6   | NA       | NA       | NA         | 1.76446            | 2.56857            | 1.93493               |
| AT4G30370 | IDF1       | NA       | NA       | NA         | 1.52615            | 1.91353            | 2.77055               |
| AT3G13437 | AtEWR1     | NA       | NA       | 1.46575    | 1.73343            | 2.96613            | 1.47758               |
| AT3G14990 | AtDJ1A     | -0.99973 | NA       | NA         | 1.47868            | 2.56107            | 2.08001               |
| AT1G63460 | ATGPX8     | -0.80650 | NA       | NA         | 1.82688            | 2.09707            | 2.15711               |
| AT1G07260 | UGT71C3    | NA       | NA       | NA         | 1.50394            | 1.75944            | 2.64793               |
| AT5G20250 | DIN10      | NA       | NA       | NA         | 1.84889            | 2.51312            | 1.54512               |
| AT3G07525 | ATATG10    | NA       | NA       | NA         | 1.22515            | 1.98609            | 2.62613               |
| AT3G59660 | BAGP1      | NA       | NA       | NA         | 1.30777            | 2.51778            | 1.98800               |
| AT1G17600 | SOC3       | NA       | NA       | 0.79065    | 1.76793            | 2.29470            | 1.70773               |
| AT3G53230 | AtCDC48B   | NA       | 0.76303  | NA         | 1.52621            | 1.98517            | 2.25522               |
| AT3G48090 | ATEDS1     | NA       | NA       | NA         | 1.84994            | 2.16398            | 1.73318               |
| AT1G21250 | AtWAK1     | NA       | 0.66828  | 1.68633    | 1.51317            | 1.91823            | 2.21596               |
| AT3G20250 | APUM5      | NA       | NA       | NA         | 1.34951            | 2.55312            | 1.71931               |
| AT4G03960 | AtPFA-DSP4 | NA       | NA       | NA         | 1.46182            | 1.93360            | 2.15744               |
| AT3G45590 | ATSEN1     | NA       | NA       | NA         | 1.39062            | 1.93826            | 2.18657               |
| AT5G24530 | AtDMR6     | -0.65303 | NA       | 1.37507    | 1.63013            | 2.07627            | 1.74156               |
| AT4G14430 | ATECI2     | -0.36548 | NA       | -0.56686   | 1.31937            | 1.72528            | 2.39008               |
| AT3G55450 | PBL1       | -0.66365 | -0.98510 | NA         | 1.26787            | 2.26598            | 1.77271               |
| AT4G23260 | CRK18      | 0.55447  | 1.27219  | 1.21631    | 1.21510            | 2.67646            | 1.31557               |

| Gene ID   | Gene       | Col-CMV  | Col-Δ2b  | Col-2aTΔ2b | <i>dcl2/4</i> -CMV | <i>dcl2/4</i> -Δ2b | <i>dcl2/4</i> -2aTΔ2b |
|-----------|------------|----------|----------|------------|--------------------|--------------------|-----------------------|
| AT4G21980 | APG8A      | NA       | NA       | NA         | 1.12282            | 1.95575            | 2.10795               |
| AT3G25882 | NIMIN-2    | NA       | NA       | NA         | 1.28842            | 1.84293            | 2.04130               |
| AT1G53320 | AtTLP7     | -0.67431 | -0.63760 | -0.89198   | 1.44554            | 1.74842            | 1.78624               |
| AT3G12490 | ATCYS6     | -0.69963 | -0.64231 | -0.83653   | 1.40849            | 1.74314            | 1.82361               |
| AT5G07470 | ATMSRA3    | -0.36689 | NA       | NA         | 1.37025            | 1.53703            | 2.00064               |
| AT3G63080 | ATGPX5     | NA       | 0.47707  | NA         | 1.20444            | 1.64963            | 2.03775               |
| AT5G27100 | ATGLR2.1   | NA       | NA       | NA         | 1.52459            | 1.35260            | 2.01343               |
| AT5G01560 | LecRK-VI.4 | NA       | NA       | 0.55149    | 1.47541            | 1.33489            | 2.01562               |
| AT2G43850 | ILK1       | NA       | NA       | NA         | 1.11154            | 2.04573            | 1.62960               |
| AT2G43350 | ATGPX3     | -0.65022 | -0.52952 | NA         | 1.31151            | 1.65214            | 1.78308               |
| AT2G19810 | AtOZF1     | -0.75251 | -0.73779 | NA         | 1.62744            | 1.39345            | 1.69383               |
| AT1G65980 | TPX1       | -0.51934 | NA       | -0.48052   | 1.41936            | 1.38707            | 1.88822               |
| AT5G45250 | RPS4       | -0.51313 | NA       | NA         | 1.27194            | 1.67947            | 1.71125               |
| AT4G22305 | SOBER1     | NA       | 0.63969  | 1.25951    | 1.39176            | 1.50166            | 1.75226               |
| AT5G43170 | AZF3       | NA       | NA       | NA         | 1.57396            | 1.32083            | 1.73809               |
| AT2G25110 | AtSDF2     | -0.50299 | NA       | NA         | 1.03041            | 1.77167            | 1.80521               |
| AT5G37055 | ATSWC6     | -0.86416 | NA       | -0.74127   | 1.48909            | 1.26024            | 1.83304               |
| AT4G04920 | AtSFR6     | -0.92241 | NA       | -0.51070   | 1.12654            | 1.72298            | 1.63719               |
| AT3G63420 | AGG1       | NA       | 0.44099  | NA         | 1.38121            | 1.55668            | 1.53949               |
| AT2G01340 | At17.1     | NA       | NA       | NA         | 1.20902            | 1.40753            | 1.85250               |
| AT4G23240 | CRK16      | NA       | NA       | NA         | 1.48976            | 1.72115            | 1.11065               |
| AT3G55460 | At-SCL30   | -0.69870 | NA       | -0.49296   | 1.47558            | 1.32238            | 1.52159               |
| AT5G48810 | ATB5-B     | -0.57471 | NA       | -0.55947   | 1.31650            | 1.22399            | 1.71824               |
| AT1G64280 | ATNPR1     | NA       | NA       | NA         | 1.24864            | 1.63524            | 1.12819               |
| AT4G03510 | ATRMA1     | NA       | NA       | NA         | 1.16303            | 1.22224            | 1.56059               |
| AT1G52740 | H2A.Z      | -0.85375 | -0.47628 | -0.99045   | 1.14798            | 1.26534            | 1.27041               |
| AT1G09415 | NIMIN-3    | -0.45902 | -0.47260 | -0.97724   | 1.43799            | 1.07643            | 1.04635               |
| AT5G63030 | GRXC1      | NA       | 0.51488  | NA         | 1.15167            | 1.15665            | 1.17257               |
